# Supplementary material
Source: publisher figshare collection journal article supplement (https://karger.figshare.com/ndownloader/files/40882484)
Supplement: Supplementary file 1 [file 40882484]

**sTable 1 Univariable and multivariable analysis of risk factors for complications in splenectomy group (ITT analysis)**

|  | n | No. with complications | Univariable analysis | |  | Multivariable analysis | |
| --- | --- | --- | --- | --- | --- | --- | --- |
|  | Relative risk | P |  | Relative risk | P |
| Depth of tumor invasion |  |  |  |  |  |  |  |
| T2 | 141 | 44 | 1 |  |  | 1 |  |
| T3, T4 | 113 | 33 | 0.936(0.642 - 1.365) | 0.7306 |  | 0.945 (0.580 - 1.539) | 0.8197 |
| Lymph node metastasis |  |  |  |  |  |  |  |
| N0 | 99 | 32 | 1 |  |  | 1 |  |
| N1, N2 | 155 | 45 | 0.898 (0.616 - 1.309) | 0.5763 |  | 0.924 (0.569 - 1.501) | 0.7500 |
| Sex |  |  |  |  |  |  |  |
| M | 196 | 60 | 1 |  |  | 1 |  |
| F | 58 | 17 | 0.957 (0.609 - 1.504) | 0.8505 |  | 1.190 (0.670 - 2.113) | 0.5529 |
| Age (years) |  |  |  |  |  |  |  |
| <65 | 123 | 29 | 1 |  |  | 1 |  |
| ≥65 | 131 | 48 | 1.554 (1.052 - 2.295) | 0.0266 |  | 1.539 (0.967 - 2.450) | 0.0690 |
| Body mass index |  |  |  |  |  |  |  |
| <25 | 192 | 50 | 1 |  |  | 1 |  |
| ≥25 | 62 | 27 | 1.672 (1.155 - 2.422) | 0.0065 |  | 1.603 (0.989 - 2.600) | 0.0556 |
| Operating time (min) |  |  |  |  |  |  |  |
| <229 | 117 | 29 | 1 |  |  | 1 |  |
| ≥229 | 137 | 48 | 1.414 (0.958 - 2.086) | 0.0815 |  | 1.151 (0.697 - 1.900) | 0.5822 |
| Blood loss (ml) |  |  |  |  |  |  |  |
| <350 | 111 | 25 | 1 |  |  | 1 |  |
| ≥350 | 143 | 52 | 1.615 (1.074 - 2.427) | 0.0212 |  | 1.415 (0.824 - 2.430) | 0.2078 |
